# Supplementary material for: Effect of Vesicle Size on the Cytolysis of Cell-Penetrating Peptides (CPPs)
Source: MDPI journal article supplement (doi:10.3390/ijms21197405), 2020-10-07

(a)

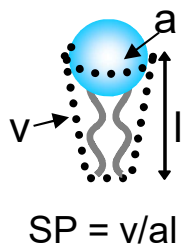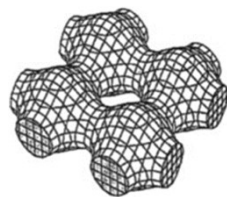

tetragonal mesh phase

(b)

$L\alpha$   
 $SP = 1$

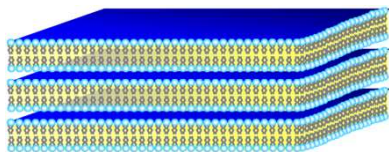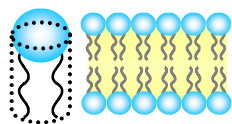

(c)

$Mesh_1$   
 $1/2 < SP < 2/3$

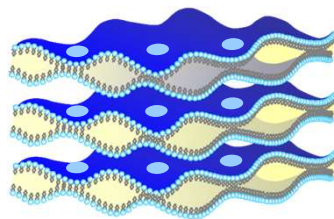

Positive curvature

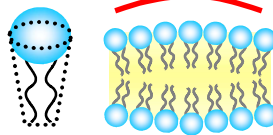

(d)

$V_1$   
 $1/2 < SP < 2/3$

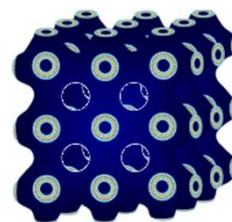

(e)

$H_1$   
 $SP = 1/2$

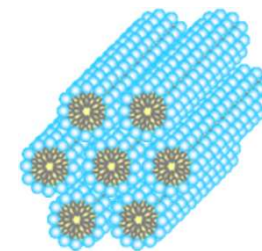

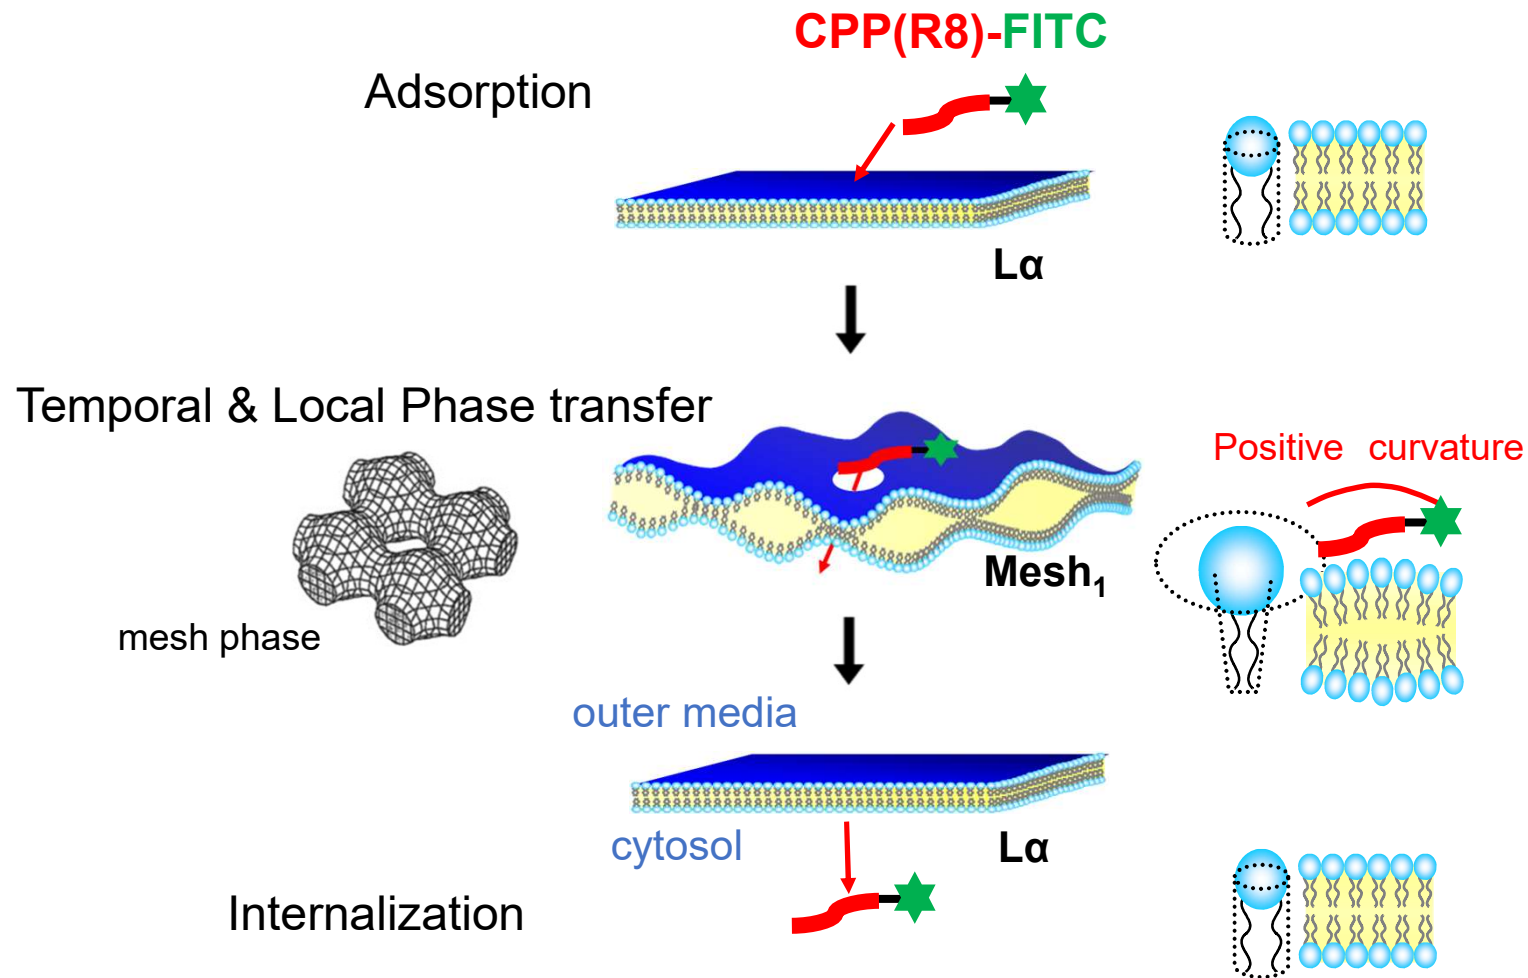

**Cytolysis mechanism (Direct internalization)**

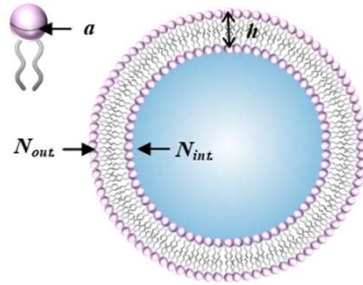

The number of phospholipid molecules of the outer surface of the vesicles ( $N_{out}$ ) is represented by the formula (3).

$$N_{out} = \frac{4\pi\left(\frac{d}{2}\right)^2}{a} \quad (3)$$

The number of phospholipid molecules of the internal surface of the vesicles ( $N_{int}$ ) is represented by the formula (4).

$$N_{int} = \frac{4\pi\left(\frac{d}{2} - h\right)^2}{a} \quad (4)$$

Since the molecular occupation area  $a$  of E-PC is  $0.71\text{nm}^2$  and the thickness the bi-layer formed by the phospholipid is about  $5\text{nm}$ , the number of phospholipid molecules consisting GUV of E-PC is represented by the following formula (5).

$$N_{tot} = \frac{\left[4\pi\left(\frac{d}{2}\right)^2 + 4\pi\left(\frac{d}{2} - 5\right)^2\right]}{a} \quad (5)$$

Since the diameter of GUV is about  $14\mu\text{m}$ ,  $N_{tot}=1.7 \times 10^9$  by formulae (5),  $N_{out}=8.8 \times 10^8$  from formulae (4) and  $N_{int}=8.8 \times 10^8$  are obtained.

The number of the vesicles  $N_{vesic}$  in  $1\text{mL}$  vesicle suspension is represented by the following formula (6).

$$N_{vesic} = \frac{M_{lipid} \times N_A}{N_{tot} \times 1000} \quad (6)$$

Wherein  $M_{lipid}$  and  $N_A$  represent molar concentration ( $\text{mol/L}$ ) of the phospholipid and the Avogadro number ( $6.0 \times 10^{23}(\text{mol}^{-1})$ ), respectively.

Since the molar concentration of the phospholipid is  $1.7\text{mM}$ ,  $N_{vesi}$  is obtained by the above formula (6) as follows.

$$N_{vesi} = 5.82 \times 10^8 \text{ (unit/mL)}.$$

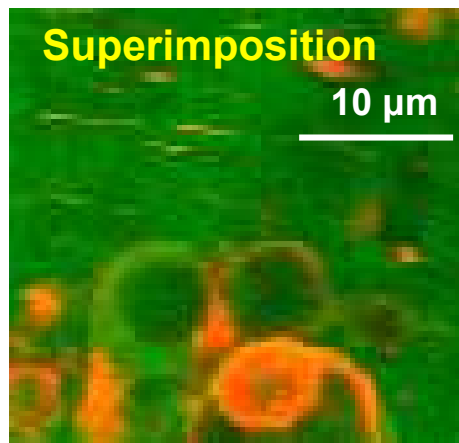

LC phase (30°C)

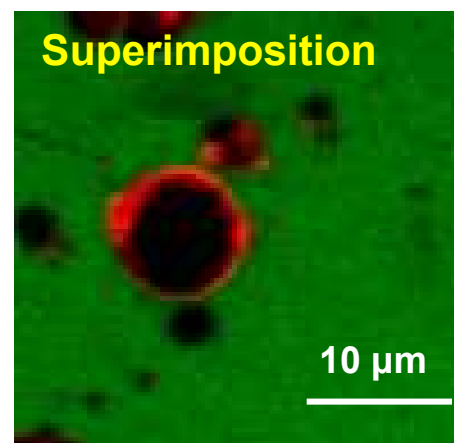

Gel phase (0°C)

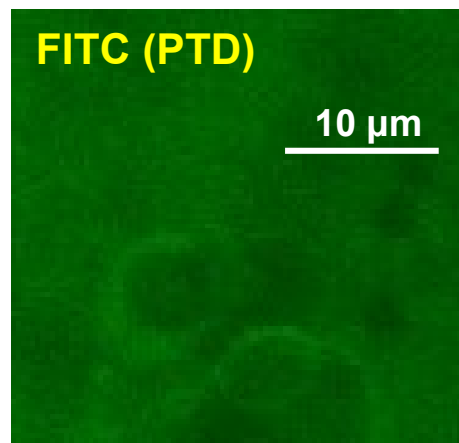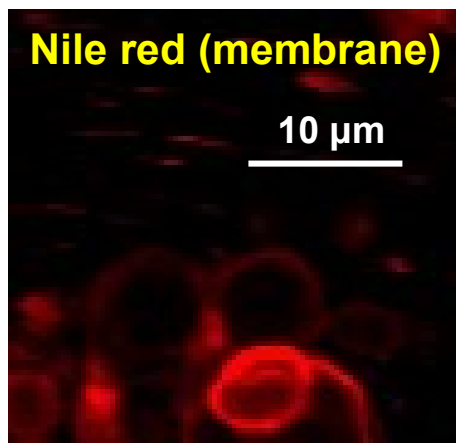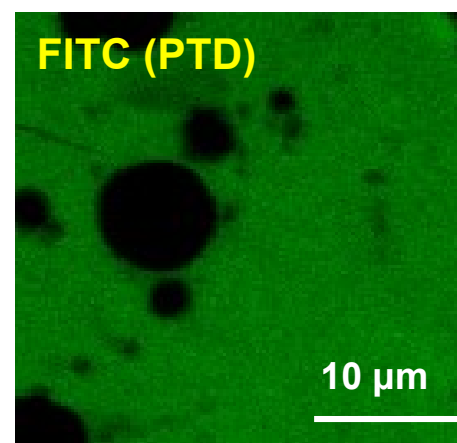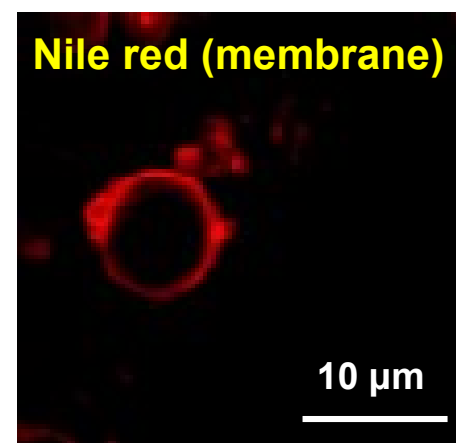

**(a)**

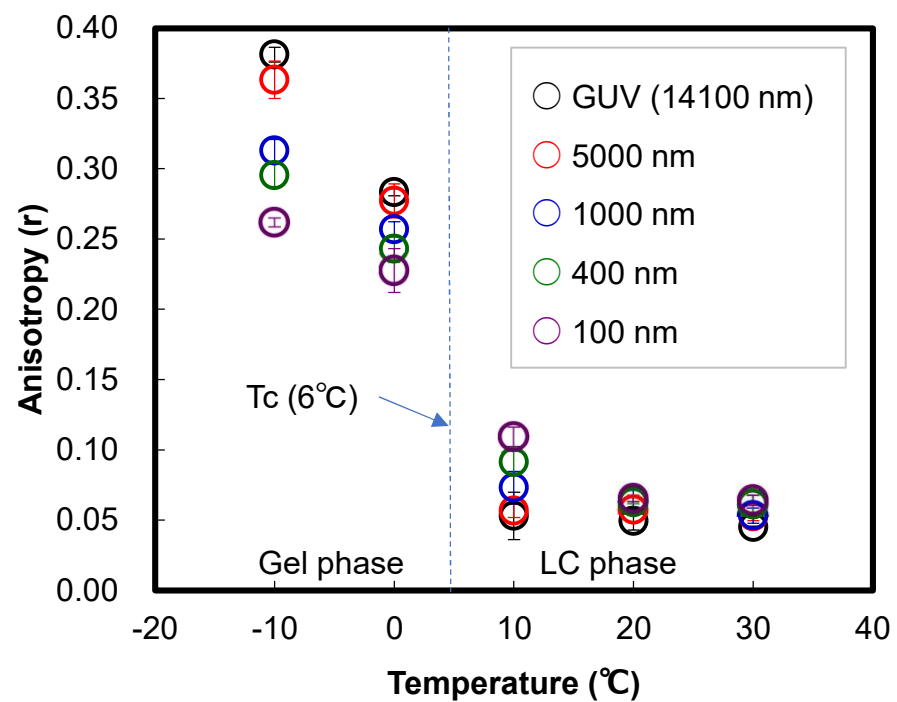

**(b)**

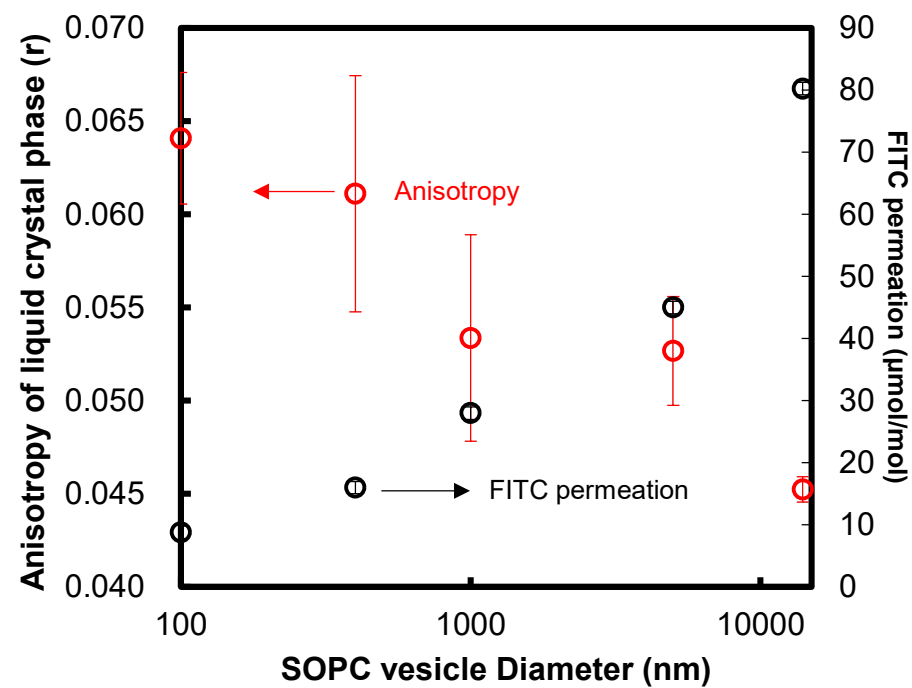

## Conceptual model for CPC cytolysis

“The Man Who Could Walk through Walls” (Le Passe-Muraille)

By Marcel Aymé, 1943 [21]

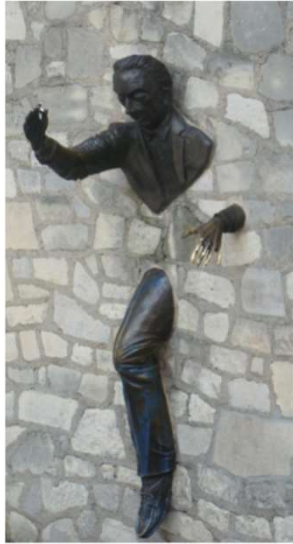

Statue at Montmartre, Paris  
Courtesy of Dr. Nomura, Hokkaido Univ.

One day Mr. Dutillueul (Mr. D) discovered himself capable to walk through walls. When he approaches, he felt wall surrounding him melts into fluid and he can walk in and through it without any resistance.

Cell membrane as a wall for CPP (Mr. D) must be permeable fluid to be passed through.  
If the wall is resistant to change its curvature, Mr. D must have difficulty to walk into the wall.

### Cytolysis mechanism (Direct internalization) [12]

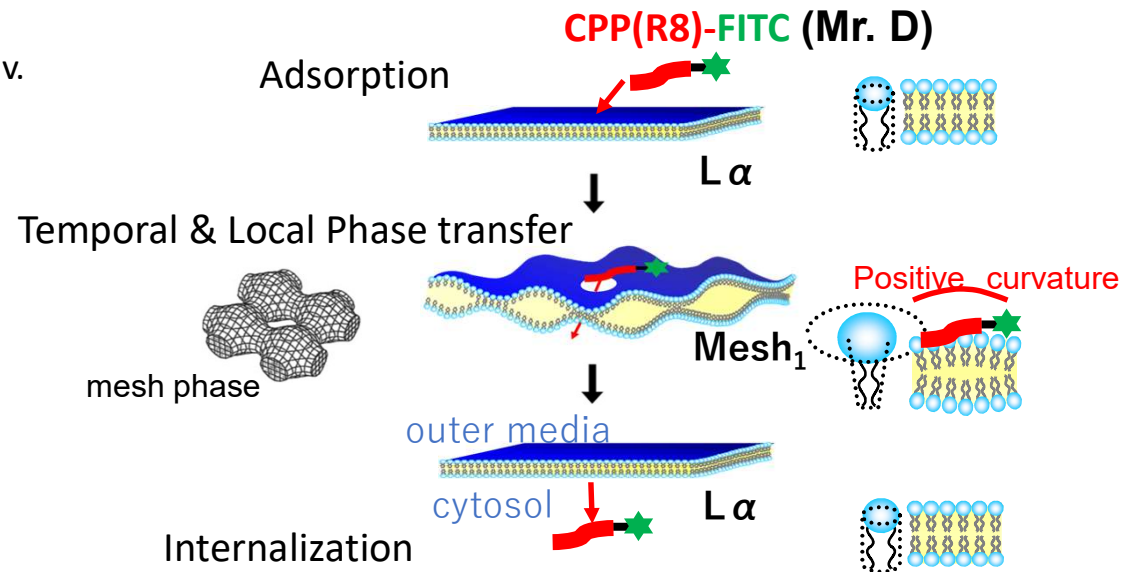

Supplement: s1 [file s1]
